# Supplementary material for: Epigenetic loss of heterogeneity from low to high grade localized prostate tumours
Source: PubMed Central journal article supplement (PMC8674326; doi:10.1038/s41467-021-27615-8), 2021-12-15
Supplement: 41467_2021_27615_MOESM3_ESM.pdf [file 41467_2021_27615_MOESM3_ESM.pdf]

## **Description of Additional Supplementary Files**

File Name: Supplementary Data 1

Description: CAPRA-S and MSKCC nomogram calculations of patients in our cohort.

File Name: Supplementary Data 2

Description: CAPRA calculations of patients in the TCGA PRAD cohort.

File Name: Supplementary Data 3

Description: Tn5 and PCR oligo sequences used in the study.
